# Supplementary material
Source: MDPI journal article supplement (https://www.mdpi.com/2673-8007/3/1/17)
Supplement: s1 [file s1]

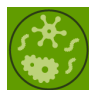

## Supplementary data

### Synthesis, computational studies, and anti-tuberculosis activity of benzoxazines that acts as RAGE inhibitors

Hanumantharayappa Bharathkumar<sup>1</sup>, Surender Mohan<sup>2</sup>, SeferBaday<sup>3,4</sup>, Peter E. Lobie<sup>5,6,7,\*</sup> and Basappa Basappa<sup>2,\*</sup>

<sup>1</sup> Department of Chemistry, Bangalore University, Jnana Bharathi Campus, Bangalore 560056, Karnataka, India

<sup>2</sup> Laboratory of Chemical Biology, Department of Studies in Organic Chemistry, University of Mysore, Manasagangotri, Mysore 570006, Karnataka, India;

<sup>3</sup> Applied Informatics Department, Informatics Institute, Istanbul Technical University, AyazagaYerleskesi, Maslak, Istanbul 34469, Turkey

<sup>4</sup> Centre for Molecular Informatics, Department of Chemistry, University of Cambridge, Lensfield Road, Cambridge CB2 1TN, UK

<sup>5</sup> Tsinghua Berkeley Shenzhen Institute, Tsinghua Shenzhen International Graduate School, Tsinghua University, Shenzhen 518055, China

<sup>6</sup> Institute of Biopharmaceutical and Health Engineering, Tsinghua Shenzhen International Graduate School, Tsinghua University, Shenzhen 518055, China

<sup>7</sup> Shenzhen Bay Laboratory, Shenzhen 518055, China

\* Correspondence: pelobie@sz.tsinghua.edu.cn (P.E.L.); salundibasappa@gmail.com (B.B.)

#### Table of contents

**Figure S1: <sup>1</sup>H NMR of compound 3a.**

**Figure S2: ESI-MS of compound 3a.**

**Figure S3: <sup>1</sup>H NMR of compound 3b.**

**Figure S4: ESI-MS of compound 3b**

**Figure S5: ESI-MS of compound 3c**

**Figure S6: <sup>1</sup>H NMR of compound 3d.**

**Figure S7: ESI-MS of compound 3d**

**Figure S8: ESI-MS of compound 3e**

**Figure S9: <sup>1</sup>H NMR of compound 3f**

**Figure S10: ESI-MS of compound 3f**

**Figure S11: <sup>1</sup>H NMR of compound 3g**

**Figure S12: ESI-MS of compound 3g**

**Figure S13: ESI-MS of compound 3h**

**Figure S14: <sup>1</sup>H NMR of compound 3i**

**Figure S15: ESI-MS of compound 3i**

**Figure S16: <sup>1</sup>H NMR of compound 3j**

**Figure S17: ESI-MS of compound 3j**

**3a. 6-chloro-2-(4-nitrophenyl)-2,4-dihydro-1H-benzo[d][1,3]oxazine:**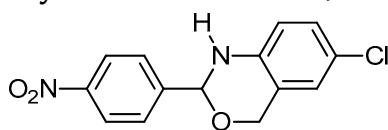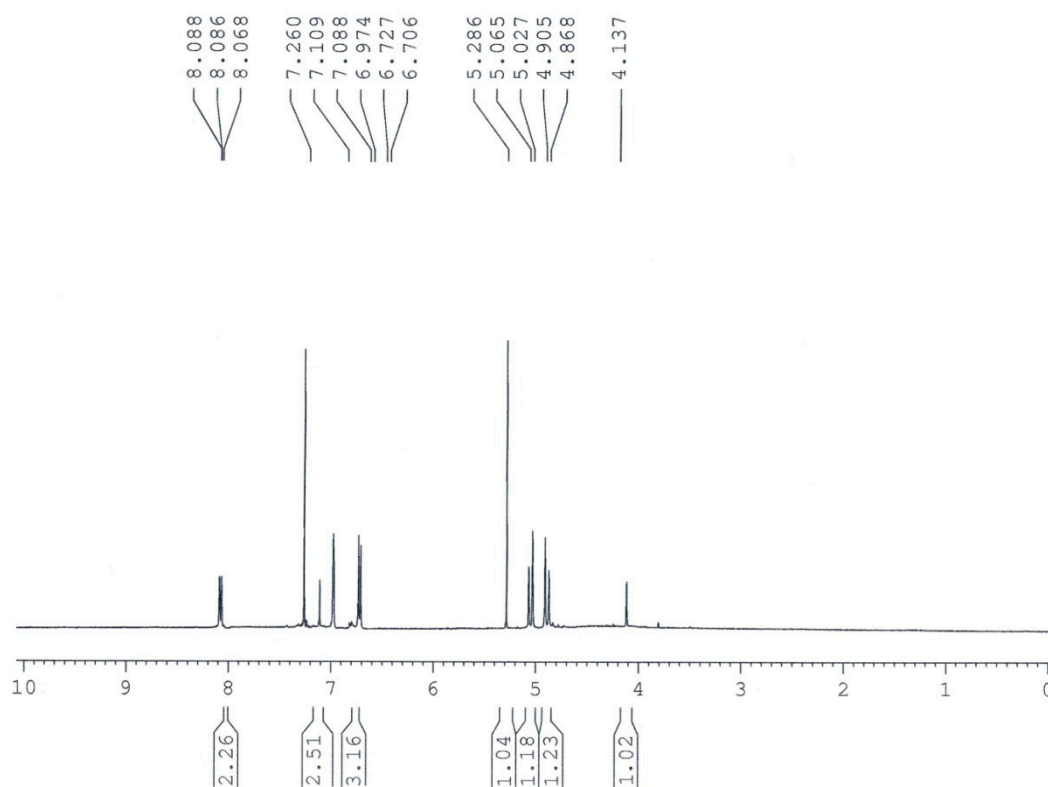Figure S1: <sup>1</sup>H NMR of compound 3a.

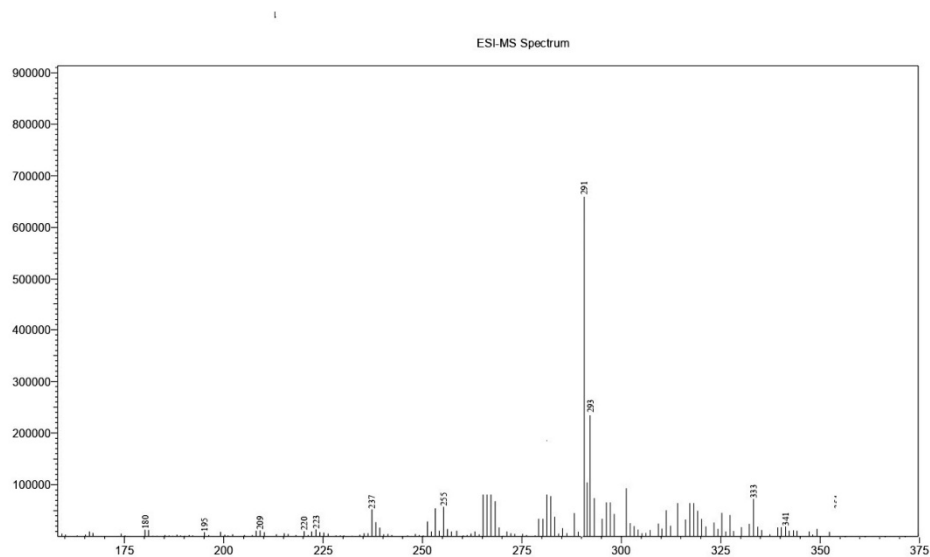

Figure S2: ESI-MS of compound 3a.

**3b. 6-chloro-2-(2-methyl-1H-indol-3-yl)-2,4-dihydro-1H-benzo[d][1,3]oxazine:**

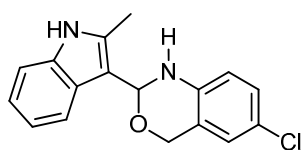

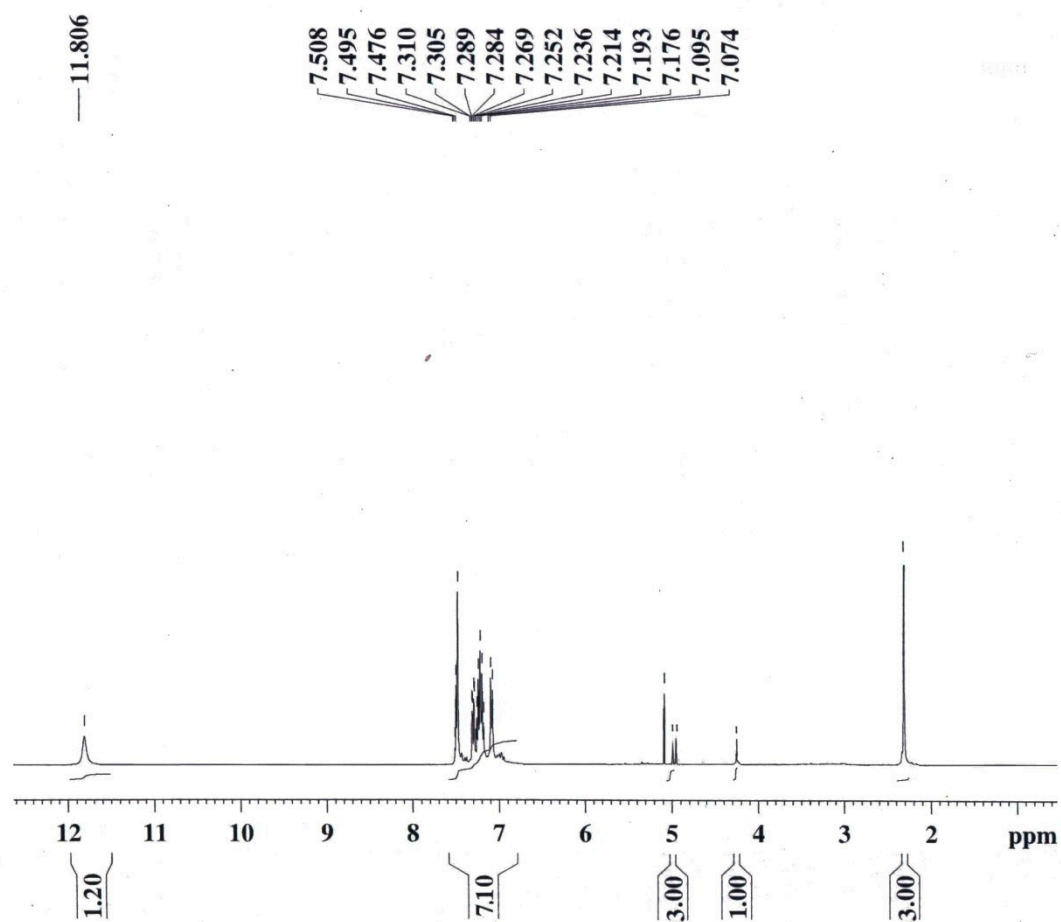Figure S3: <sup>1</sup>H NMR of compound 3b.

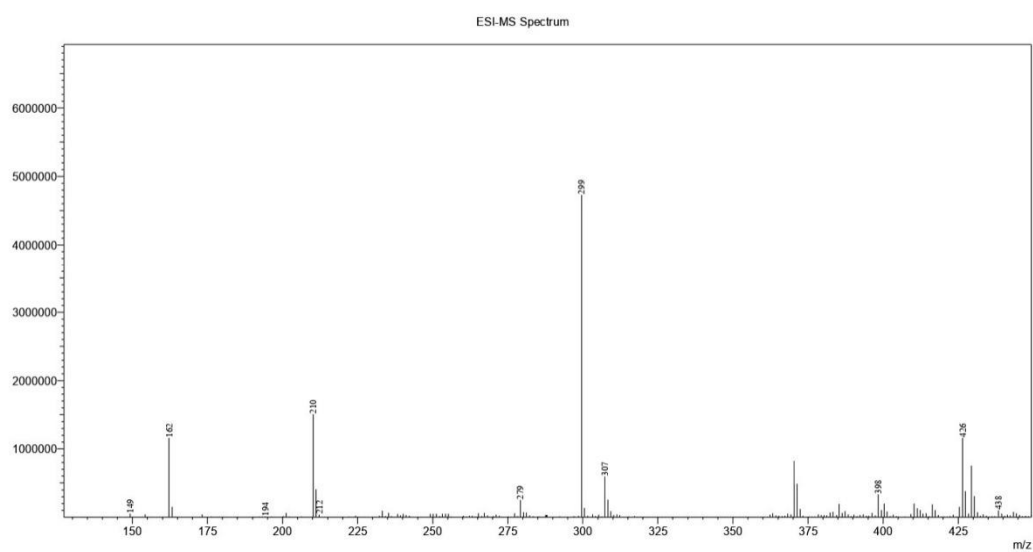

Figure S4: ESI-MS of compound 3b

3c. 2-(2,6-dichlorophenyl)-6-methyl-2,4-dihydro-1H-benzo[d][1,3]oxazine:

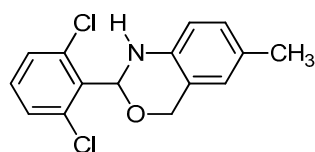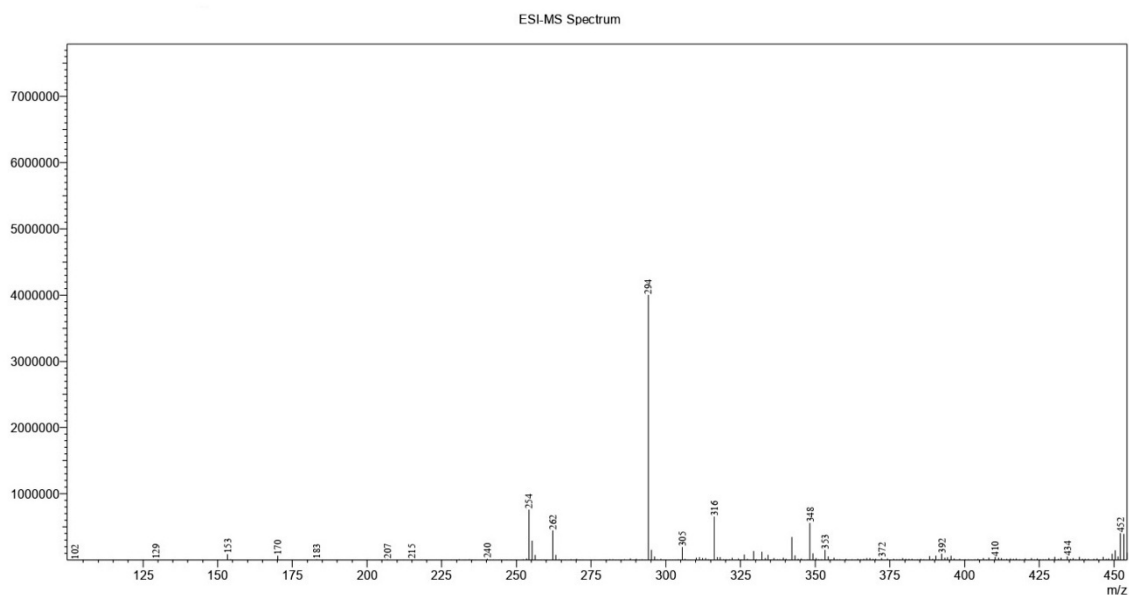

Figure S5: ESI-MS of compound 3c

3d. 2-(1H-indol-3-yl)-6-methyl-2,4-dihydro-1H-benzo[d][1,3]oxazine:

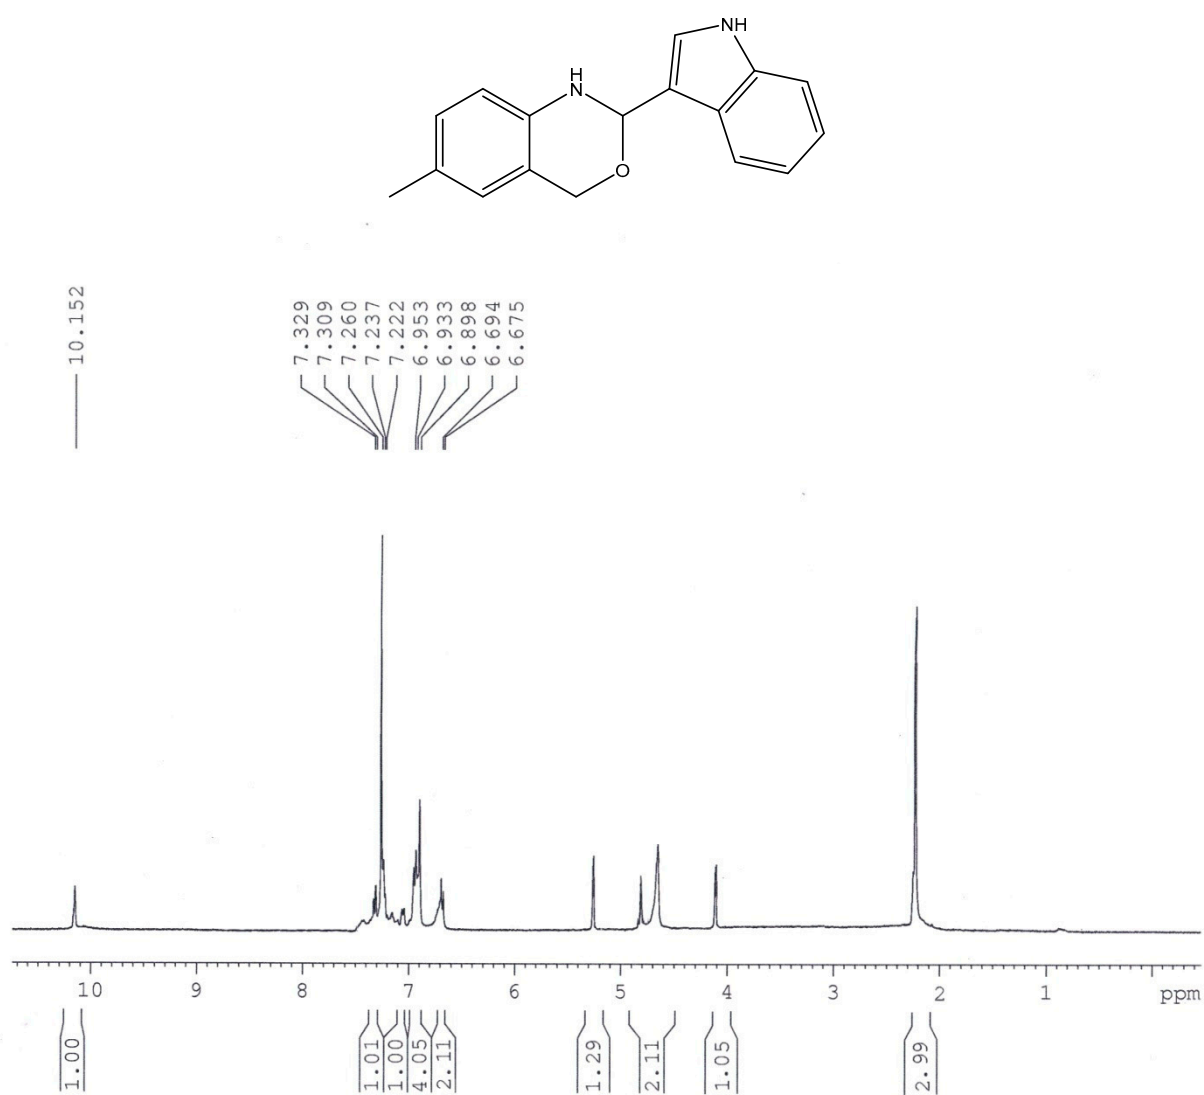Figure S6: <sup>1</sup>H NMR of compound 3d.

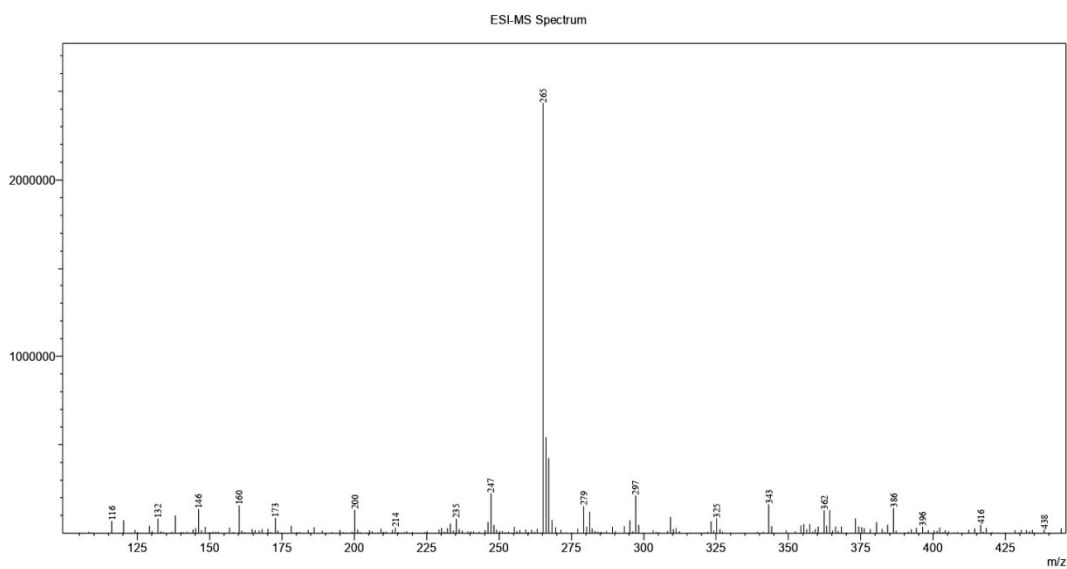

Figure S7: ESI-MS of compound 3d

3e. 6-methyl-2-(1-methyl-1H-imidazol-5-yl)-2,4-dihydro-1H-benzo[d][1,3]oxazine:

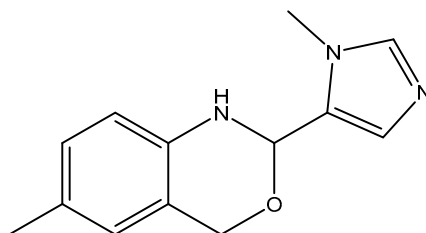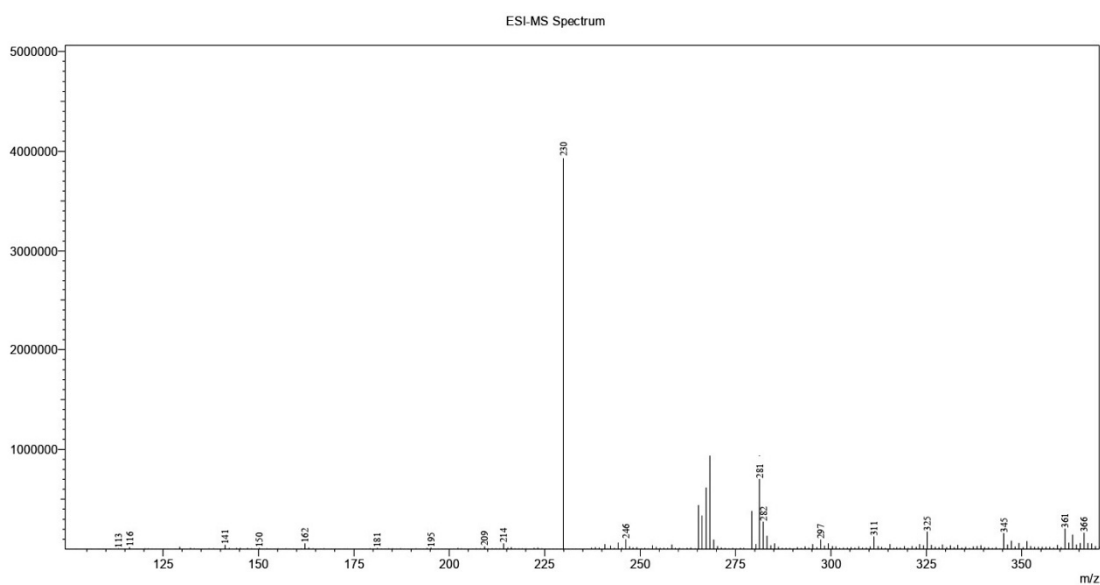

Figure S8: ESI-MS of compound 3e

3f. 4-(6-methyl-2,4-dihydro-1H-benzo[d][1,3]oxazin-2-yl)phenol:

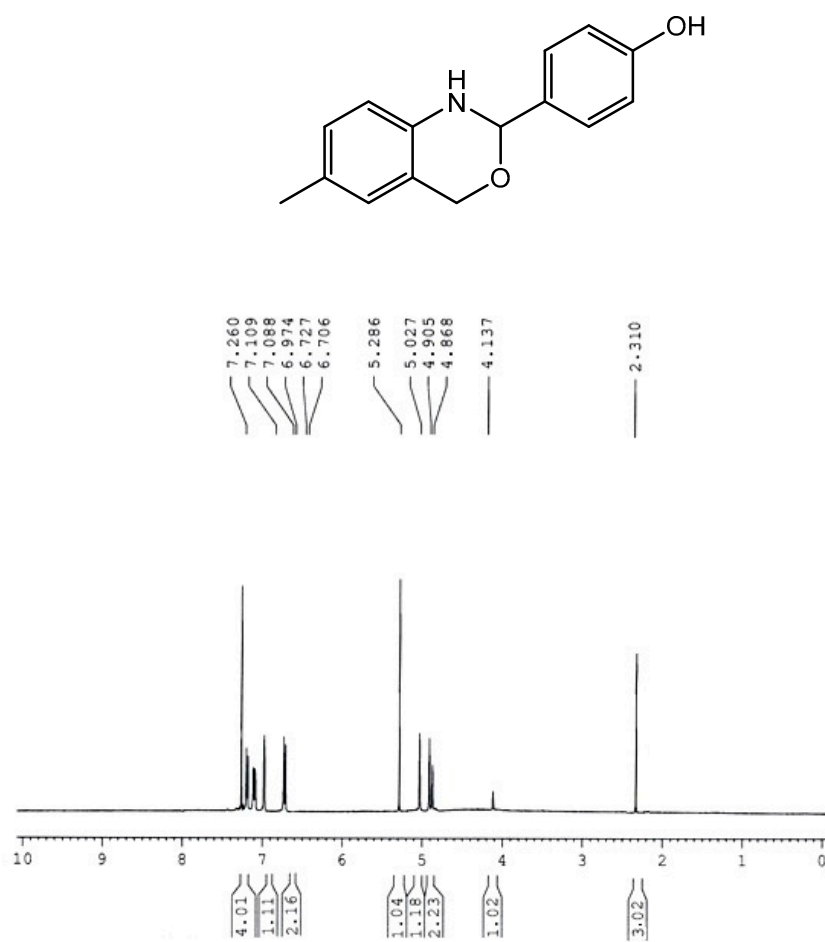Figure S9: <sup>1</sup>H NMR of compound 3f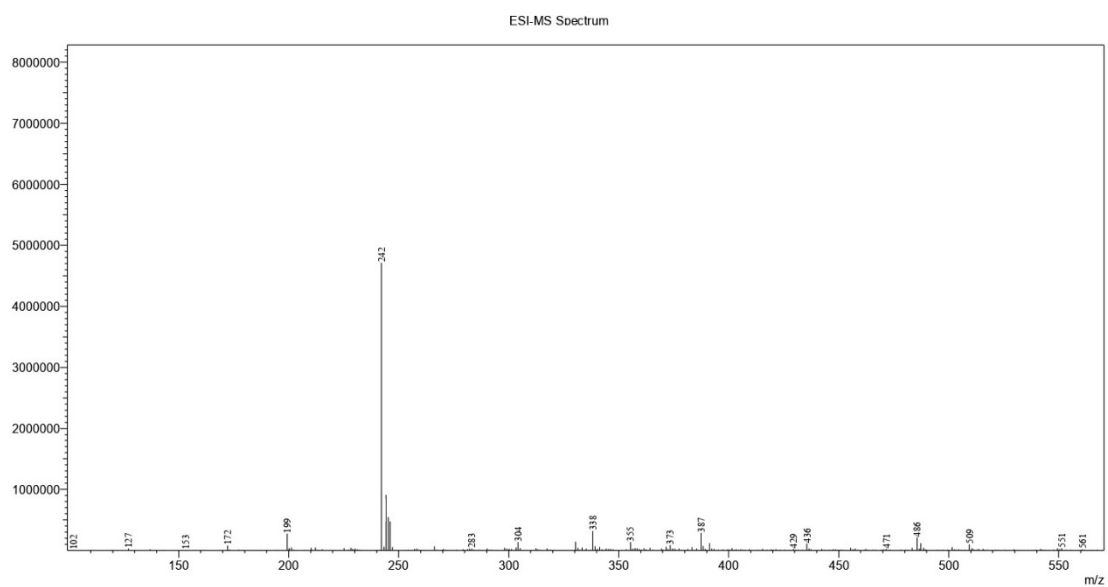

Figure S10: ESI-MS of compound 3f



**3g. 2-(2-butyl-4-chloro-1H-imidazol-5-yl)-6-chloro-2,4-dihydro-1H-benzo[d][1,3]oxazine**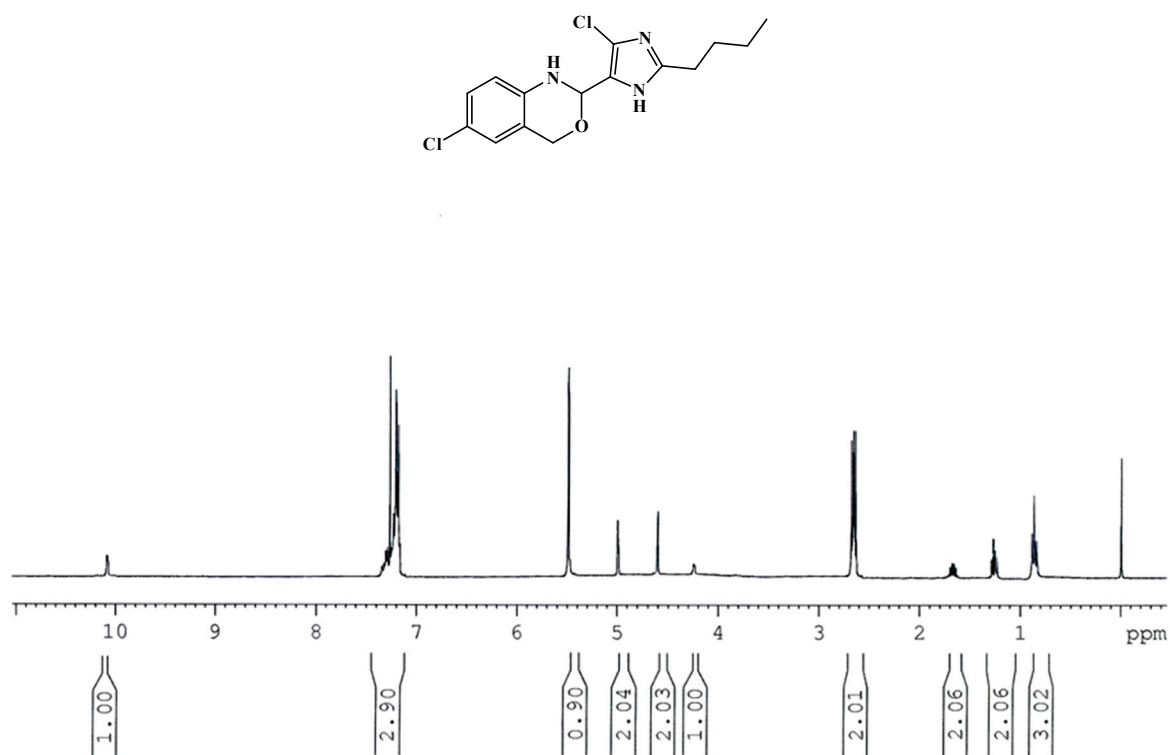Figure S11: <sup>1</sup>H NMR of compound 3g

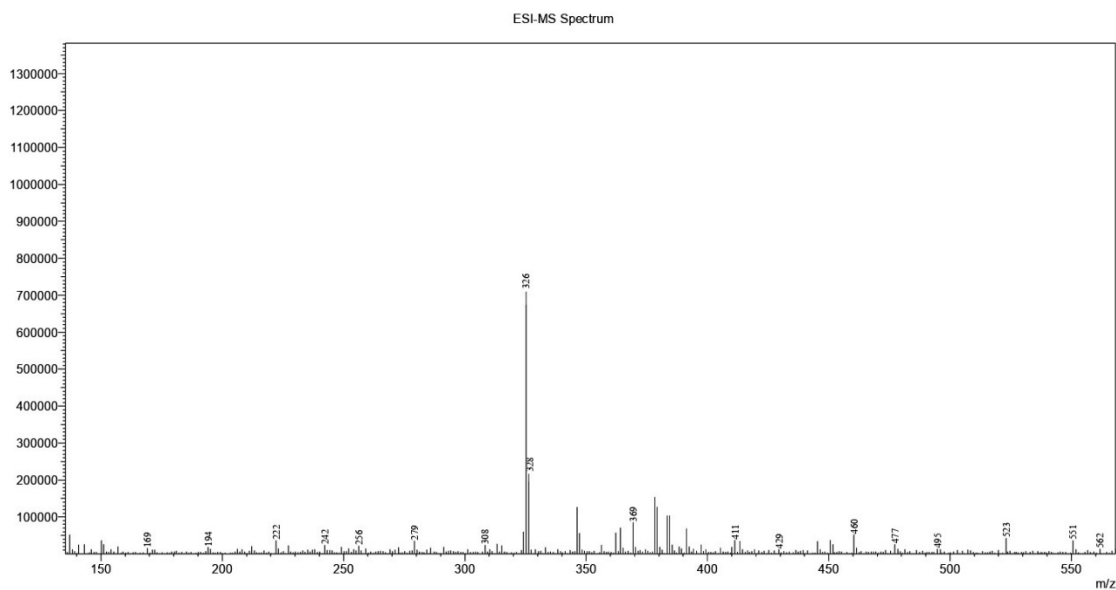

Figure S12: ESI-MS of compound 3g

**3h. 2-(2-butyl-4-chloro-1H-imidazol-5-yl)-6-methyl-2,4-dihydro-1H-benzo[d][1,3]oxazine**

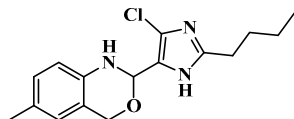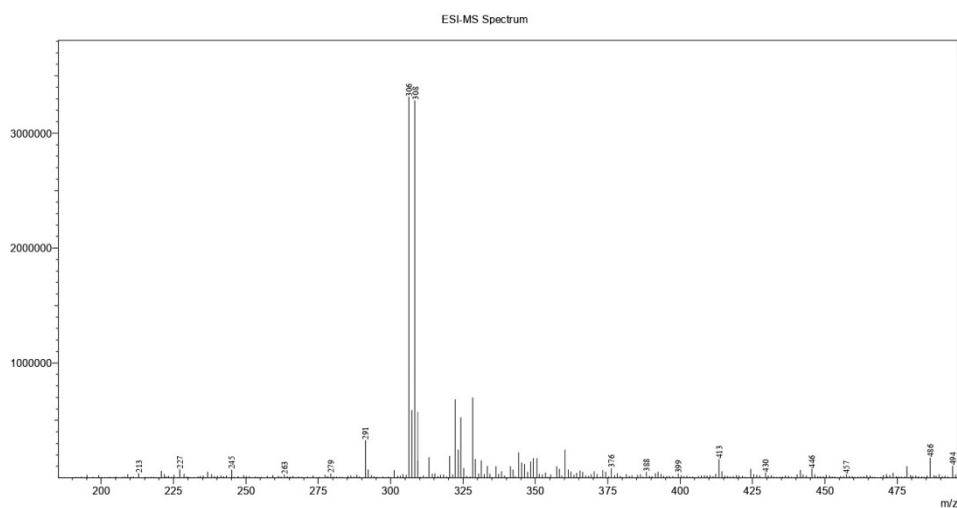

Figure S13: ESI-MS of compound 3h

**3i. 2-(2-bromophenyl)-6-methyl-2,4-dihydro-1H-benzo[d][1,3]oxazine:**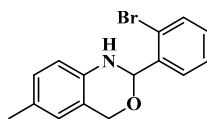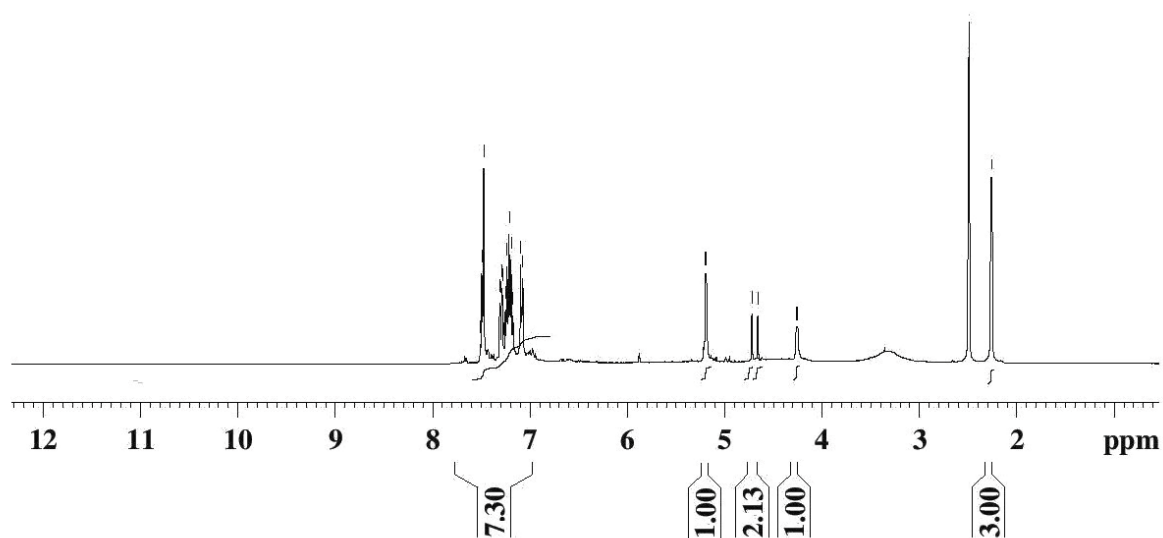Figure S14:  $^1\text{H}$  NMR of compound 3i

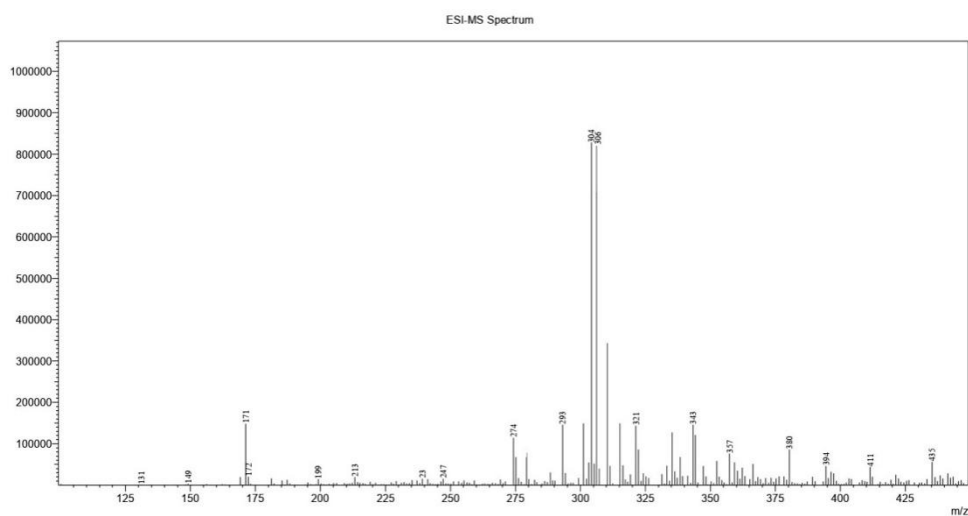

Figure S15: ESI-MS of compound 3i

**3j. 6-chloro-2-(1-methyl-1H-imidazol-5-yl)-2,4-dihydro-1H-benzo[d][1,3]oxazine:**

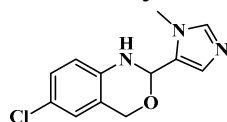

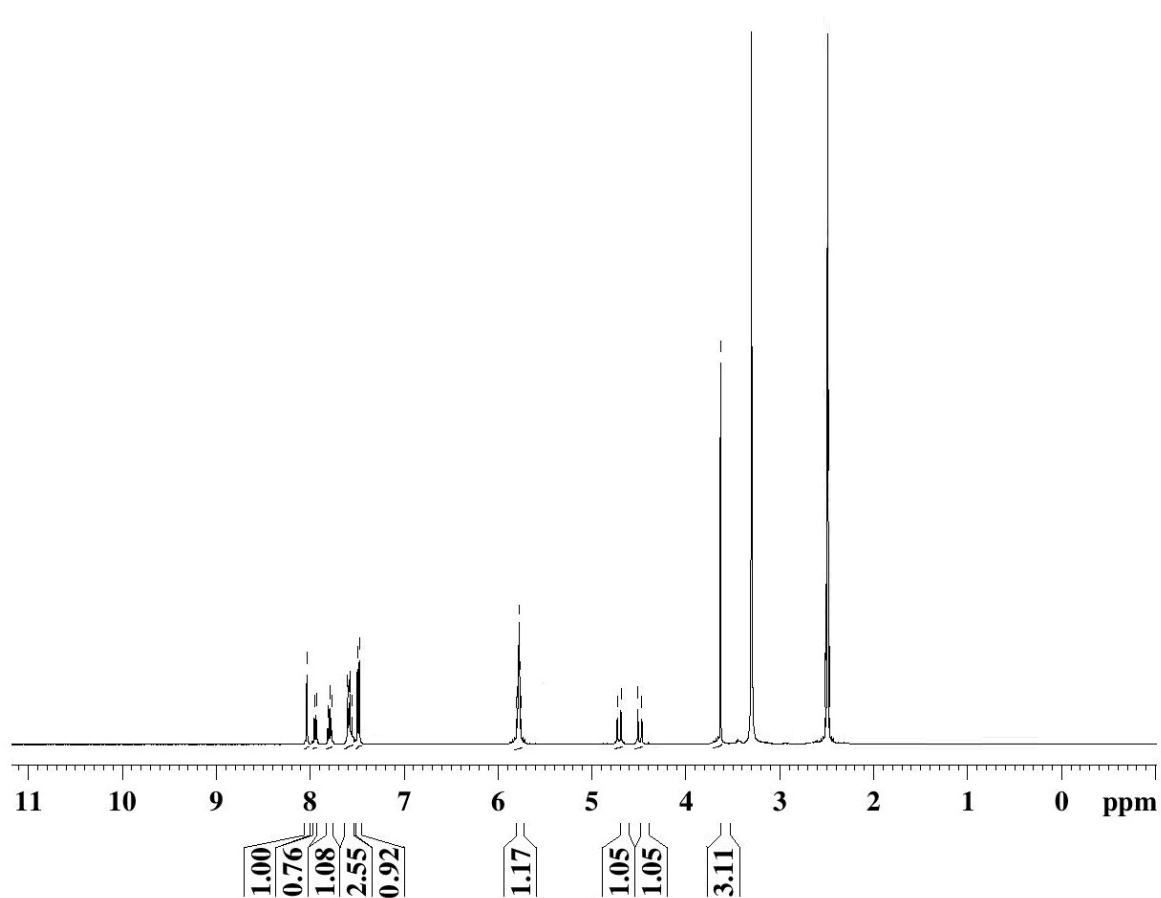Figure S16: <sup>1</sup>H NMR of compound 3j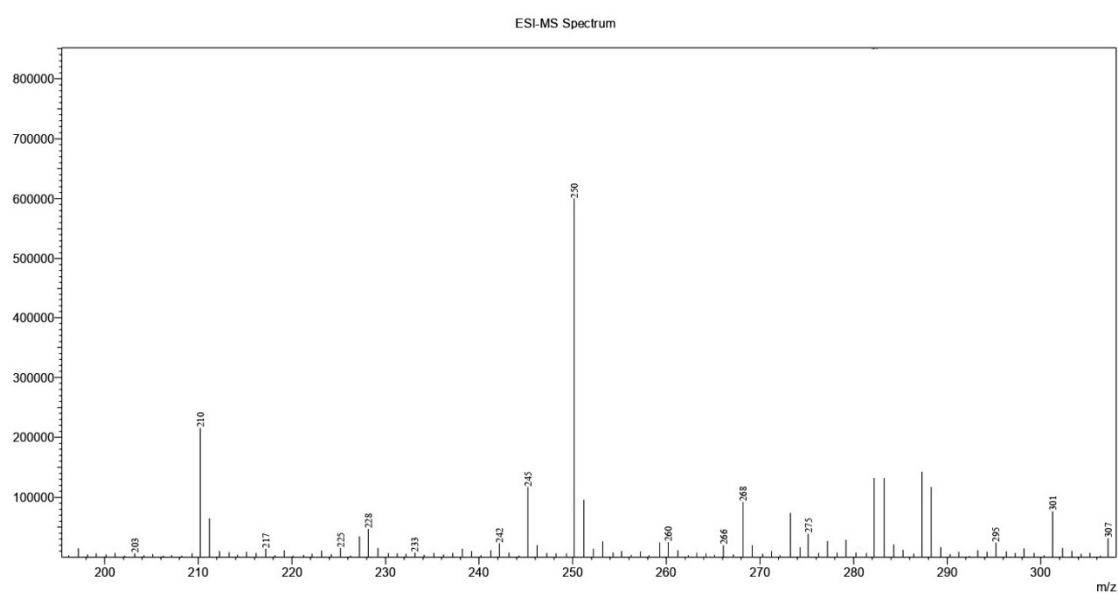

Figure S17: ESI-MS of compound 3j
